# Supplementary material for: Associations of Dietary Fats with All-Cause Mortality and Cardiovascular Disease Mortality among Patients with Cardiometabolic Disease
Source: MDPI journal article supplement (doi:10.3390/nu14173608), 2022-08-31
Supplement: s1 [file s1]

**Table S1.** Baseline characteristics of patients with cardiometabolic diseases in NHANES III and NHANES 1999-2014 according to the tertiles of energy percentage from  $\omega$ -6 PUFA and  $\omega$ -3 PUFA <sup>a</sup>

| Characteristics                 | Tertile of $\omega$ -6 PUFA intake |       |       | Tertile of $\omega$ -3 PUFA intake |       |       |
|---------------------------------|------------------------------------|-------|-------|------------------------------------|-------|-------|
|                                 | T1                                 | T2    | T3    | T1                                 | T2    | T3    |
| Participants ( <i>n</i> )       | 2845                               | 2846  | 2846  | 2845                               | 2845  | 2845  |
| Fatty acid intake (% of energy) | 3.92                               | 6.26  | 9.58  | 0.40                               | 0.65  | 1.12  |
| Male ( %)                       | 46.88                              | 48.96 | 49.75 | 45.60                              | 49.70 | 50.31 |
| Age (years)                     | 61.42                              | 61.75 | 60.80 | 60.71                              | 61.49 | 61.75 |
| Race (%)                        |                                    |       |       |                                    |       |       |
| Non-Hispanic White              | 70.75                              | 70.45 | 72.93 | 70.63                              | 71.26 | 72.31 |
| Non-Hispanic Black              | 12.44                              | 14.48 | 13.75 | 12.95                              | 14.61 | 13.07 |
| Mexican American                | 6.07                               | 6.77  | 5.63  | 7.33                               | 5.72  | 5.35  |
| Others                          | 10.74                              | 8.30  | 7.70  | 9.08                               | 8.41  | 9.27  |
| Education level (%)             |                                    |       |       |                                    |       |       |
| Less than high school           | 37.46                              | 33.68 | 27.40 | 38.12                              | 32.11 | 28.17 |
| High school or equivalent       | 25.37                              | 29.27 | 28.77 | 27.19                              | 28.60 | 27.56 |
| College or above                | 37.17                              | 37.06 | 43.83 | 34.69                              | 39.29 | 44.27 |

## Family income-poverty ratio level (%)

|                         |       |       |       |       |       |       |
|-------------------------|-------|-------|-------|-------|-------|-------|
| < 1.3                   | 28.90 | 25.50 | 21.67 | 29.27 | 25.21 | 21.55 |
| 1.3 - 2.4               | 31.09 | 33.36 | 30.42 | 32.17 | 33.25 | 29.37 |
| ≥ 2.4                   | 40.00 | 41.15 | 47.91 | 38.57 | 41.54 | 49.09 |
| BMI group (%)           |       |       |       |       |       |       |
| < 18.5                  | 0.87  | 1.88  | 0.69  | 1.19  | 1.51  | 0.69  |
| 18.5 -< 25              | 21.96 | 20.68 | 17.16 | 20.65 | 20.80 | 18.31 |
| 25 -< 30                | 32.68 | 30.01 | 31.34 | 33.26 | 29.76 | 31.06 |
| ≥ 30                    | 44.49 | 47.43 | 50.81 | 44.90 | 47.93 | 49.95 |
| Smoking status ( %)     |       |       |       |       |       |       |
| Never smoker            | 41.76 | 42.47 | 42.90 | 41.12 | 42.84 | 43.17 |
| Former smoker           | 37.27 | 37.16 | 39.16 | 38.09 | 36.31 | 39.21 |
| Current smoker          | 20.97 | 20.38 | 17.94 | 20.79 | 20.85 | 17.61 |
| Alcohol drinking (%)    |       |       |       |       |       |       |
| Non-drinker             | 79.26 | 79.10 | 83.30 | 79.56 | 80.08 | 82.13 |
| Low to moderate drinker | 11.46 | 14.50 | 10.84 | 11.61 | 12.57 | 12.48 |
| Heavy drinker           | 9.28  | 6.40  | 5.85  | 8.83  | 7.35  | 5.39  |

|                                    |         |         |         |         |         |         |
|------------------------------------|---------|---------|---------|---------|---------|---------|
| Physical activity (%)              |         |         |         |         |         |         |
| Inactive                           | 38.41   | 39.97   | 43.13   | 38.12   | 40.13   | 43.32   |
| Insufficiently active              | 35.01   | 33.92   | 31.93   | 34.02   | 34.96   | 31.87   |
| Active                             | 26.58   | 26.11   | 24.94   | 27.86   | 24.91   | 24.81   |
| Self-reported health status (%)    |         |         |         |         |         |         |
| Poor to fair                       | 46.95   | 40.66   | 42.04   | 45.93   | 42.78   | 41.08   |
| Good                               | 32.37   | 38.04   | 37.82   | 32.98   | 35.70   | 39.43   |
| Very good/excellent                | 20.68   | 21.30   | 20.14   | 21.09   | 21.52   | 19.49   |
| Self-reported chronic diseases (%) |         |         |         |         |         |         |
| Hypertension                       | 60.56   | 63.42   | 64.53   | 61.12   | 63.21   | 64.17   |
| Hyperlipemia                       | 64.72   | 70.23   | 71.59   | 65.69   | 70.29   | 70.53   |
| Cancer                             | 16.44   | 19.44   | 18.23   | 17.14   | 17.59   | 19.28   |
| Total energy intake (kcal/d)       | 1689.80 | 1802.57 | 1933.60 | 1710.30 | 1847.73 | 1870.75 |
| Protein intake (% of energy)       | 17.26   | 16.79   | 15.93   | 16.55   | 16.60   | 16.80   |
| Carbohydrate intake (% of energy)  | 53.20   | 49.23   | 44.68   | 53.11   | 48.59   | 45.33   |

<sup>a</sup> All estimates accounted for complex survey designs. Values were mean for continuous variables and percentages for categorical variables. Abbreviation and acronyms: BMI body mass index..

**Table S2.** Associations between specific fatty acids and all-cause mortality and CVD mortality in the general population ( $n = 43450$ ) <sup>a</sup>

|                                | Tertiles of percentage energy from specific fatty acids |                  |                  | <i>p</i> -Trend <sup>b</sup> |
|--------------------------------|---------------------------------------------------------|------------------|------------------|------------------------------|
|                                | Tertile 1                                               | Tertile 2        | Tertile 3        |                              |
| SFA                            |                                                         |                  |                  |                              |
| All-cause mortality            |                                                         |                  |                  |                              |
| MV-adjusted model <sup>c</sup> | 1 (ref.)                                                | 1.02 (0.94-1.10) | 1.08 (0.98-1.20) | 0.09                         |
| CVD mortality                  |                                                         |                  |                  |                              |
| MV-adjusted model <sup>c</sup> | 1 (ref.)                                                | 0.85 (0.71-1.02) | 0.86 (0.66-1.12) | 0.35                         |
| MUFA                           |                                                         |                  |                  |                              |
| All-cause mortality            |                                                         |                  |                  |                              |
| MV-adjusted model <sup>c</sup> | 1 (ref.)                                                | 1.09 (0.93-1.28) | 1.11 (0.90-1.37) | 0.46                         |
| CVD mortality                  |                                                         |                  |                  |                              |
| MV-adjusted model <sup>c</sup> | 1 (ref.)                                                | 1.02 (0.85-1.22) | 1.15 (0.87-1.51) | 0.41                         |
| PUFA                           |                                                         |                  |                  |                              |
| All-cause mortality            |                                                         |                  |                  |                              |
| MV-adjusted model <sup>c</sup> | 1 (ref.)                                                | 0.96 (0.87-1.05) | 0.92 (0.84-1.00) | 0.20                         |
| CVD mortality                  |                                                         |                  |                  |                              |
| MV-adjusted model <sup>c</sup> | 1 (ref.)                                                | 0.93 (0.78-1.11) | 0.88 (0.71-1.09) | 0.33                         |
| ω-6 PUFA                       |                                                         |                  |                  |                              |
| All-cause mortality            |                                                         |                  |                  |                              |
| MV-adjusted model <sup>c</sup> | 1 (ref.)                                                | 0.96 (0.88-1.05) | 0.93 (0.85-1.00) | 0.05                         |
| CVD mortality                  |                                                         |                  |                  |                              |
| MV-adjusted model <sup>c</sup> | 1 (ref.)                                                | 0.89 (0.73-1.09) | 0.89 (0.72-1.11) | 0.27                         |
| LA                             |                                                         |                  |                  |                              |
| All-cause mortality            |                                                         |                  |                  |                              |
| MV-adjusted model <sup>c</sup> | 1 (ref.)                                                | 0.96 (0.88-1.05) | 0.93 (0.86-1.01) | 0.06                         |
| CVD mortality                  |                                                         |                  |                  |                              |
| MV-adjusted model <sup>c</sup> | 1 (ref.)                                                | 0.91 (0.76-1.09) | 0.91 (0.74-1.13) | 0.13                         |
| AA                             |                                                         |                  |                  |                              |
| All-cause mortality            |                                                         |                  |                  |                              |
| MV-adjusted model <sup>c</sup> | 1 (ref.)                                                | 0.94 (0.85-1.05) | 0.90 (0.80-1.01) | 0.06                         |
| CVD mortality                  |                                                         |                  |                  |                              |
| MV-adjusted model <sup>c</sup> | 1 (ref.)                                                | 0.87 (0.71-1.07) | 0.87 (0.71-1.05) | 0.34                         |
| ω-3 PUFA                       |                                                         |                  |                  |                              |
| All-cause mortality            |                                                         |                  |                  |                              |
| MV-adjusted model <sup>c</sup> | 1 (ref.)                                                | 0.96 (0.88-1.03) | 0.90 (0.83-0.97) | 0.01                         |
| CVD mortality                  |                                                         |                  |                  |                              |
| MV-adjusted model <sup>c</sup> | 1 (ref.)                                                | 0.84 (0.69-1.03) | 0.80 (0.67-0.96) | 0.02                         |
| ALA                            |                                                         |                  |                  |                              |
| All-cause mortality            |                                                         |                  |                  |                              |
| MV-adjusted model <sup>c</sup> | 1 (ref.)                                                | 0.99 (0.92-1.07) | 0.97 (0.89-1.06) | 0.45                         |
| CVD mortality                  |                                                         |                  |                  |                              |
| MV-adjusted model <sup>c</sup> | 1 (ref.)                                                | 0.88 (0.74-1.04) | 0.91 (0.77-1.07) | 0.27                         |
| Marine ω-3 PUFA                |                                                         |                  |                  |                              |
| All-cause mortality            |                                                         |                  |                  |                              |
| MV-adjusted model <sup>c</sup> | 1 (ref.)                                                | 0.88 (0.79-0.97) | 0.91(0.84-0.98)  | 0.03                         |

|                                |          |                  |                  |         |
|--------------------------------|----------|------------------|------------------|---------|
| CVD mortality                  |          |                  |                  |         |
| MV-adjusted model <sup>c</sup> | 1 (ref.) | 0.56 (0.47-0.68) | 0.69 (0.56-0.84) | 0.003   |
| DHA                            |          |                  |                  |         |
| All-cause mortality            |          |                  |                  |         |
| MV-adjusted model <sup>c</sup> | 1 (ref.) | 0.90 (0.81-0.99) | 0.91 (0.84-0.99) | 0.04    |
| CVD mortality                  |          |                  |                  |         |
| MV-adjusted model <sup>c</sup> | 1 (ref.) | 0.54 (0.45-0.65) | 0.70 (0.57-0.84) | 0.003   |
| EPA                            |          |                  |                  |         |
| All-cause mortality            |          |                  |                  |         |
| MV-adjusted model <sup>c</sup> | 1 (ref.) | 0.90 (0.81-1.00) | 0.87 (0.80-0.95) | 0.003   |
| CVD mortality                  |          |                  |                  |         |
| MV-adjusted model <sup>c</sup> | 1 (ref.) | 0.51 (0.42-0.62) | 0.62 (0.49-0.77) | 0.001   |
| DPA                            |          |                  |                  |         |
| All-cause mortality            |          |                  |                  |         |
| MV-adjusted model <sup>c</sup> | 1 (ref.) | 0.79 (0.70-0.88) | 0.87 (0.79-0.96) | 0.01    |
| CVD mortality                  |          |                  |                  |         |
| MV-adjusted model <sup>c</sup> | 1 (ref.) | 0.54 (0.44-0.65) | 0.57 (0.48-0.69) | <0.0001 |

<sup>a</sup> All estimates accounted for complex survey designs. <sup>b</sup> *p* trend was calculated by median values of each fatty acids. <sup>c</sup> Multivariable-adjusted model (MV-adjusted model) was adjusted for gender, age, race, educational levels, PIR, BMI, smoking status, alcohol drinking status, physical activity status, self-reported health status, baseline history of hypertension, hyperlipidemia, total energy intake, energy intake derived from carbohydrate, protein intake (in tertiles), cholesterol levels (in tertiles), and energy intake derived from remaining fatty acids (SFA, MUFA, and PUFA) where appropriate.

**Table S3.** Associations between specific fatty acids and all-cause mortality and CVD mortality after excluding patients who died within first two years of follow-up among patients with CMD (*n* = 7492) <sup>a</sup>

|                                | Tertiles of percentage energy from specific fatty acids |                  |                  | <i>p</i> -Trend <sup>b</sup> |
|--------------------------------|---------------------------------------------------------|------------------|------------------|------------------------------|
|                                | Tertile 1                                               | Tertile 2        | Tertile 3        |                              |
| SFA                            |                                                         |                  |                  |                              |
| All-cause mortality            |                                                         |                  |                  |                              |
| MV-adjusted model <sup>c</sup> | 1(ref.)                                                 | 0.93 (0.80-1.09) | 0.99 (0.82-1.19) | 0.96                         |
| CVD mortality                  |                                                         |                  |                  |                              |
| MV-adjusted model <sup>c</sup> | 1(ref.)                                                 | 0.90 (0.62-1.31) | 1.02 (0.68-1.55) | 0.97                         |
| MUFA                           |                                                         |                  |                  |                              |
| All-cause mortality            |                                                         |                  |                  |                              |
| MV-adjusted model <sup>c</sup> | 1(ref.)                                                 | 1.09 (0.93-1.28) | 1.11 (0.90-1.37) | 0.37                         |
| CVD mortality                  |                                                         |                  |                  |                              |
| MV-adjusted model <sup>c</sup> | 1(ref.)                                                 | 0.92 (0.69-1.25) | 1.00 (0.69-1.45) | 0.90                         |
| PUFA                           |                                                         |                  |                  |                              |
| All-cause mortality            |                                                         |                  |                  |                              |
| MV-adjusted model <sup>c</sup> | 1(ref.)                                                 | 0.93 (0.81-1.07) | 0.86 (0.73-1.02) | 0.06                         |
| CVD mortality                  |                                                         |                  |                  |                              |
| MV-adjusted model <sup>c</sup> | 1(ref.)                                                 | 1.29 (1.03-1.63) | 1.05 (0.76-1.47) | 0.81                         |
| ω-6 PUFA                       |                                                         |                  |                  |                              |
| All-cause mortality            |                                                         |                  |                  |                              |
| MV-adjusted model <sup>c</sup> | 1(ref.)                                                 | 0.92 (0.80-1.06) | 0.88 (0.76-1.03) | 0.08                         |
| CVD mortality                  |                                                         |                  |                  |                              |

|                                                   |         |                  |                  |       |
|---------------------------------------------------|---------|------------------|------------------|-------|
| MV-adjusted model <sup>c</sup><br>LA              | 1(ref.) | 1.15 (0.88-1.49) | 1.09 (0.77-1.55) | 0.66  |
| All-cause mortality                               |         |                  |                  |       |
| MV-adjusted model <sup>c</sup><br>CVD mortality   | 1(ref.) | 0.93 (0.81-1.06) | 0.88 (0.76-1.03) | 0.08  |
| MV-adjusted model <sup>c</sup><br>AA              | 1(ref.) | 1.13 (0.87-1.46) | 1.08 (0.76-1.54) | 0.73  |
| All-cause mortality                               |         |                  |                  |       |
| MV-adjusted model <sup>c</sup><br>CVD mortality   | 1(ref.) | 0.98 (0.85-1.13) | 1.06 (0.89-1.26) | 0.50  |
| MV-adjusted model <sup>c</sup><br>ω-3 PUFA        | 1(ref.) | 0.84 (0.59-1.17) | 1.10 (0.77-1.58) | 0.60  |
| All-cause mortality                               |         |                  |                  |       |
| MV-adjusted model <sup>c</sup><br>CVD mortality   | 1(ref.) | 1.02 (0.88-1.17) | 0.89 (0.75-1.05) | 0.15  |
| MV-adjusted model <sup>c</sup><br>ALA             | 1(ref.) | 0.91 (0.71-1.17) | 0.75 (0.53-1.06) | 0.10  |
| All-cause mortality                               |         |                  |                  |       |
| MV-adjusted model <sup>c</sup><br>CVD mortality   | 1(ref.) | 1.00 (0.86-1.17) | 0.96 (0.81-1.14) | 0.69  |
| MV-adjusted model <sup>c</sup><br>Marine ω-3 PUFA | 1(ref.) | 1.02 (0.80-1.31) | 0.92 (0.64-1.32) | 0.65  |
| All-cause mortality                               |         |                  |                  |       |
| MV-adjusted model <sup>c</sup><br>CVD mortality   | 1(ref.) | 0.91 (0.78-1.07) | 0.99 (0.85-1.15) | 0.98  |
| MV-adjusted model <sup>c</sup><br>DHA             | 1(ref.) | 0.69 (0.48-1.01) | 0.85 (0.65-1.10) | 0.31  |
| All-cause mortality                               |         |                  |                  |       |
| MV-adjusted model <sup>c</sup><br>CVD mortality   | 1(ref.) | 0.87 (0.74-1.02) | 0.99 (0.86-1.15) | 0.86  |
| MV-adjusted model <sup>c</sup><br>EPA             | 1(ref.) | 0.54 (0.40-0.74) | 0.88 (0.67-1.17) | 0.72  |
| All-cause mortality                               |         |                  |                  |       |
| MV-adjusted model <sup>c</sup><br>CVD mortality   | 1(ref.) | 0.96 (0.80-1.14) | 0.94 (0.81-1.09) | 0.42  |
| MV-adjusted model <sup>c</sup><br>DPA             | 1(ref.) | 0.58 (0.43-0.78) | 0.62 (0.49-0.80) | 0.001 |
| All-cause mortality                               |         |                  |                  |       |
| MV-adjusted model <sup>c</sup><br>CVD mortality   | 1(ref.) | 0.79 (0.69-0.91) | 0.86 (0.75-0.99) | 0.04  |
| MV-adjusted model <sup>c</sup>                    | 1(ref.) | 0.64 (0.46-0.88) | 0.65 (0.46-0.90) | 0.01  |

<sup>a</sup> All estimates accounted for complex survey designs. <sup>b</sup> *p* trend was calculated by median values of each fatty acids. <sup>c</sup> Multivariable-adjusted model (MV-adjusted model) was adjusted for gender, age, race, educational levels, PIR, BMI, smoking status, alcohol drinking status, physical activity status, self-reported health status, baseline history of hypertension, hyperlipidemia, use of insulin, total energy intake, energy intake derived from carbohydrate, protein intake (in tertiles), cholesterol levels (in tertiles) and energy intake derived from remaining fatty acids(SFA, MUFA, and PUFA) where appropriate.

**Table S4.** Associations between specific fatty acids and all-cause mortality and CVD mortality after further adjustment of the use of medication (including diabeto pills and insulin) ( $n = 8537$ ) <sup>a</sup>

|                                | Tertiles of percentage energy from specific fatty acids |                  |                  |                             |
|--------------------------------|---------------------------------------------------------|------------------|------------------|-----------------------------|
|                                | Tertile 1                                               | Tertile 2        | Tertile 3        | <i>P</i> trend <sup>b</sup> |
| SFA                            |                                                         |                  |                  |                             |
| All-cause mortality            |                                                         |                  |                  |                             |
| MV-adjusted model <sup>c</sup> | 1(ref.)                                                 | 1.00 (0.84-1.20) | 0.96 (0.81-1.14) | 0.69                        |
| CVD mortality                  |                                                         |                  |                  |                             |
| MV-adjusted model <sup>c</sup> | 1(ref.)                                                 | 1.00 (0.67-1.50) | 1.06 (0.61-1.85) | 0.89                        |
| MUFA                           |                                                         |                  |                  |                             |
| All-cause mortality            |                                                         |                  |                  |                             |
| MV-adjusted model <sup>c</sup> | 1(ref.)                                                 | 1.05 (0.91-1.21) | 1.00 (0.80-1.25) | 0.96                        |
| CVD mortality                  |                                                         |                  |                  |                             |
| MV-adjusted model <sup>c</sup> | 1(ref.)                                                 | 1.06 (0.61-1.85) | 0.98 (0.57-1.68) | 0.92                        |
| PUFA                           |                                                         |                  |                  |                             |
| All-cause mortality            |                                                         |                  |                  |                             |
| MV-adjusted model <sup>c</sup> | 1(ref)                                                  | 0.90 (0.77-1.05) | 0.87 (0.74-1.03) | 0.13                        |
| CVD mortality                  |                                                         |                  |                  |                             |
| MV-adjusted model <sup>c</sup> | 1(ref.)                                                 | 1.52 (1.04-2.21) | 1.10 (0.69-1.76) | 0.63                        |
| ω-6 PUFA                       |                                                         |                  |                  |                             |
| All-cause mortality            |                                                         |                  |                  |                             |
| MV-adjusted model <sup>c</sup> | 1(ref.)                                                 | 0.85 (0.73-0.99) | 0.83 (0.70-0.97) | 0.03                        |
| CVD mortality                  |                                                         |                  |                  |                             |
| MV-adjusted model <sup>c</sup> | 1(ref.)                                                 | 1.16 (0.77-1.74) | 1.00 (0.59-1.72) | 0.90                        |
| LA                             |                                                         |                  |                  |                             |
| All-cause mortality            |                                                         |                  |                  |                             |
| MV-adjusted model <sup>c</sup> | 1(ref.)                                                 | 0.86 (0.74-1.00) | 0.82 (0.69-0.97) | 0.03                        |
| CVD mortality                  |                                                         |                  |                  |                             |
| MV-adjusted model <sup>c</sup> | 1(ref.)                                                 | 1.15 (0.77-1.72) | 0.97 (0.56-1.68) | 0.81                        |
| AA                             |                                                         |                  |                  |                             |
| All-cause mortality            |                                                         |                  |                  |                             |
| MV-adjusted model <sup>c</sup> | 1(ref.)                                                 | 0.95 (0.84-1.07) | 1.08 (0.91-1.30) | 0.35                        |
| CVD mortality                  |                                                         |                  |                  |                             |
| MV-adjusted model <sup>c</sup> | 1(ref.)                                                 | 0.97 (0.56-1.68) | 1.13 (0.72-1.76) | 0.56                        |
| ω-3 PUFA                       |                                                         |                  |                  |                             |
| All-cause mortality            |                                                         |                  |                  |                             |
| MV-adjusted model <sup>c</sup> | 1(ref.)                                                 | 0.96 (0.82-1.12) | 0.88 (0.74-1.05) | 0.14                        |
| CVD mortality                  |                                                         |                  |                  |                             |
| MV-adjusted model <sup>c</sup> | 1(ref.)                                                 | 0.95 (0.65-1.40) | 0.74 (0.46-1.19) | 0.20                        |
| ALA                            |                                                         |                  |                  |                             |
| All-cause mortality            |                                                         |                  |                  |                             |
| MV-adjusted model <sup>c</sup> | 1(ref.)                                                 | 0.94 (0.80-1.10) | 0.93 (0.77-1.12) | 0.47                        |
| CVD mortality                  |                                                         |                  |                  |                             |
| MV-adjusted model <sup>c</sup> | 1(ref.)                                                 | 0.81 (0.57-1.16) | 0.97 (0.60-1.57) | 0.97                        |
| Marine ω-3 PUFA                |                                                         |                  |                  |                             |
| All-cause mortality            |                                                         |                  |                  |                             |
| MV-adjusted model <sup>c</sup> | 1(ref.)                                                 | 0.87 (0.73-1.03) | 0.93 (0.80-1.08) | 0.56                        |

|                                |         |                  |                  |      |
|--------------------------------|---------|------------------|------------------|------|
| CVD mortality                  |         |                  |                  |      |
| MV-adjusted model <sup>c</sup> | 1(ref.) | 1.57 (0.98-2.52) | 1.18 (0.71-1.97) | 0.23 |
| DHA                            |         |                  |                  |      |
| All-cause mortality            |         |                  |                  |      |
| MV-adjusted model <sup>c</sup> | 1(ref.) | 0.89 (0.76-1.05) | 0.92 (0.80-1.07) | 0.43 |
| CVD mortality                  |         |                  |                  |      |
| MV-adjusted model <sup>c</sup> | 1(ref.) | 0.71 (0.44-1.14) | 0.72 (0.47-1.09) | 0.15 |
| EPA                            |         |                  |                  |      |
| All-cause mortality            |         |                  |                  |      |
| MV-adjusted model <sup>c</sup> | 1(ref.) | 0.95 (0.79-1.14) | 0.91 (0.78-1.05) | 0.21 |
| CVD mortality                  |         |                  |                  |      |
| MV-adjusted model <sup>c</sup> | 1(ref.) | 0.58 (0.40-0.86) | 0.57 (0.39-0.84) | 0.02 |
| DPA                            |         |                  |                  |      |
| All-cause mortality            |         |                  |                  |      |
| MV-adjusted model <sup>c</sup> | 1(ref.) | 0.80 (0.69-0.94) | 0.86 (0.74-1.01) | 0.11 |
| CVD mortality                  |         |                  |                  |      |
| MV-adjusted model <sup>c</sup> | 1(ref.) | 0.61 (0.38-1.00) | 0.66 (0.43-1.00) | 0.05 |

<sup>a</sup> All estimates accounted for complex survey designs. <sup>b</sup> *P* trend was calculated by median values of each fatty acids. <sup>c</sup> Multivariable-adjusted model (MV-adjusted model) was adjusted for gender, age, race, educational levels, PIR, BMI, smoking status, alcohol drinking status, physical activity status, self-reported health status, baseline history of hypertension, hyperlipidemia, use of medication (including diabete pills and insulin), total energy intake, energy intake derived from carbohydrate, protein intake (in tertiles), cholesterol levels (in tertiles) and energy intake derived from remaining fatty acids(SFA, MUFA, and PUFA) where appropriate.
